# Supplementary material for: Analysis of Molecular Interactions between Components in Phospholipid-Immunosuppressant-Antioxidant Mixed Langmuir Films
Source: PubMed Central journal article supplement (PMC8280729; doi:10.1021/acs.langmuir.1c00434), 2021-04-29
Supplement: la1c00434_si_001.pdf [file la1c00434_si_001.pdf]

# Analysis of Molecular Interactions between Components in Phospholipid-Immunosuppressant-Antioxidant Mixed Langmuir Films

Małgorzata Jurak,<sup>a\*</sup> Klaudia Szafran<sup>a</sup>, Pilar Cea<sup>b,c</sup> and Santiago Martín<sup>b,c</sup>

<sup>a</sup> Department of Interfacial Phenomena, Institute of Chemical Sciences, Faculty of Chemistry, Maria Curie-Skłodowska University in Lublin, 20031 Lublin, Poland

<sup>b</sup> Instituto de Nanociencia y Materiales de Aragón (INMA), CSIC-Universidad de Zaragoza, 50009 Zaragoza, Spain

<sup>c</sup> Departamento de Química Física, Facultad de Ciencias, Universidad de Zaragoza, 50009 Zaragoza, Spain

*\*Corresponding author (M. Jurak)*

*e-mail address:* [malgorzata.jurak@umcs.pl](mailto:malgorzata.jurak@umcs.pl)

*phone:* +48815375547, *fax:* +48815375656

## SUPPORTING INFORMATION

**Figure S1.** Compression modulus ( $C_S^{-1}$ ) versus surface pressure ( $\pi$ ) for the binary and ternary monolayers.

**Figure S2.** Surface pressure,  $\pi$  –, electric surface potential,  $\Delta V$  –, and apparent dipole moment,  $\mu_a$  –, area,  $A$ , isotherms for all monolayers studied.

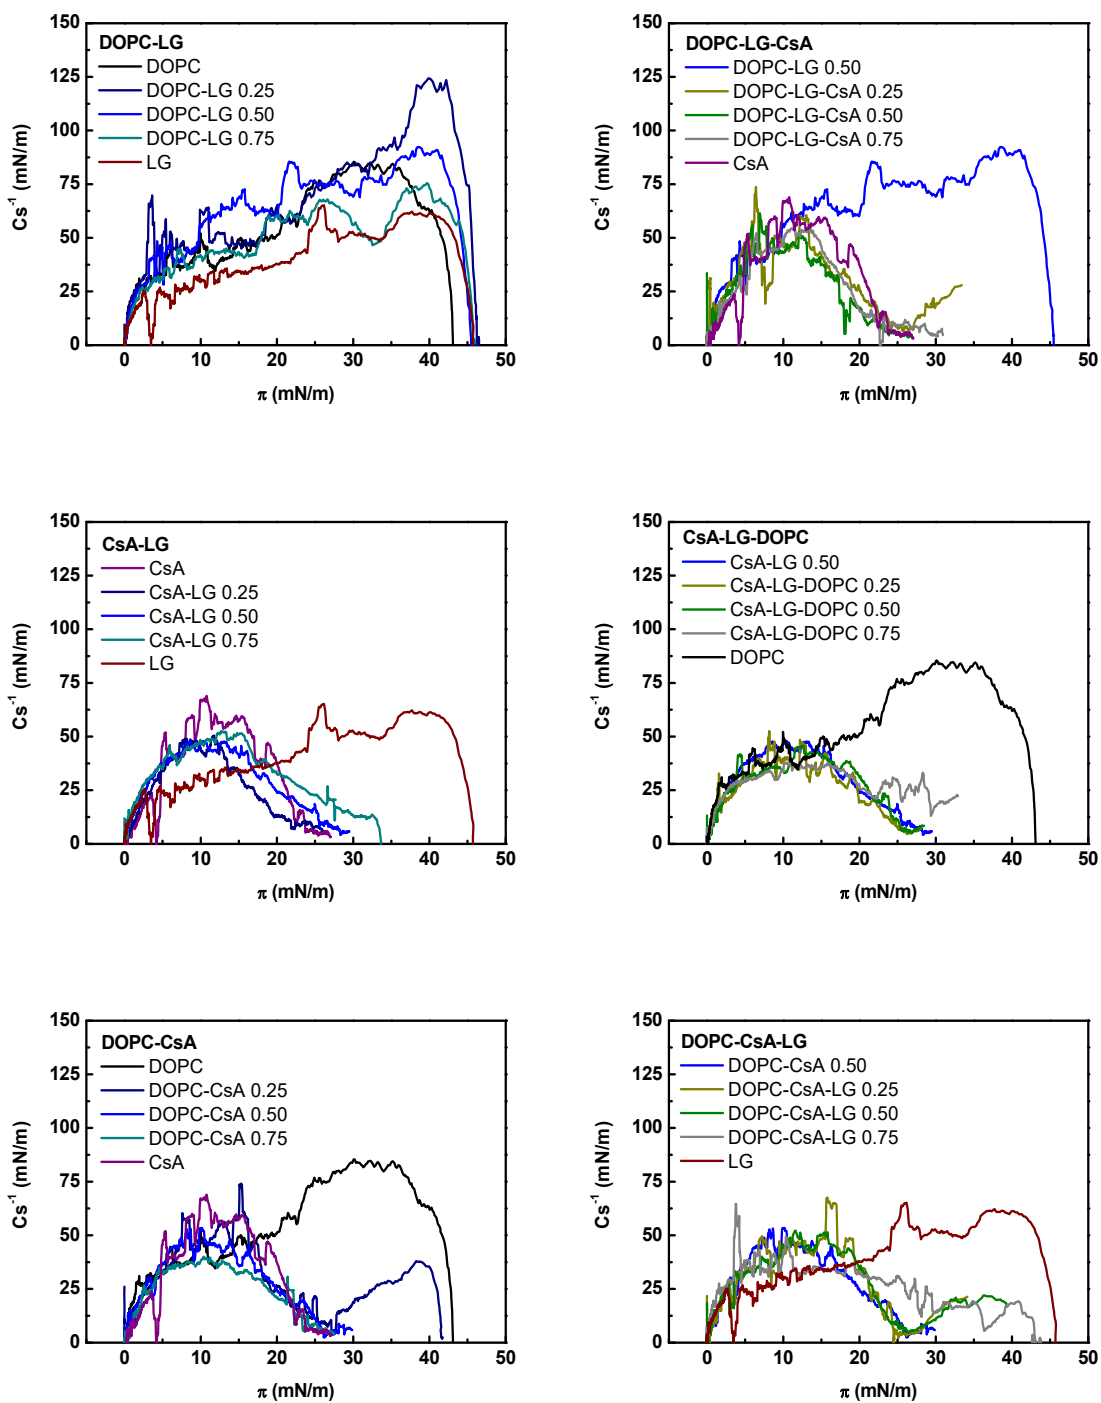

**Figure S1.** Compression modulus ( $C_s^{-1}$ ) versus surface pressure ( $\pi$ ) for the binary and ternary monolayers.

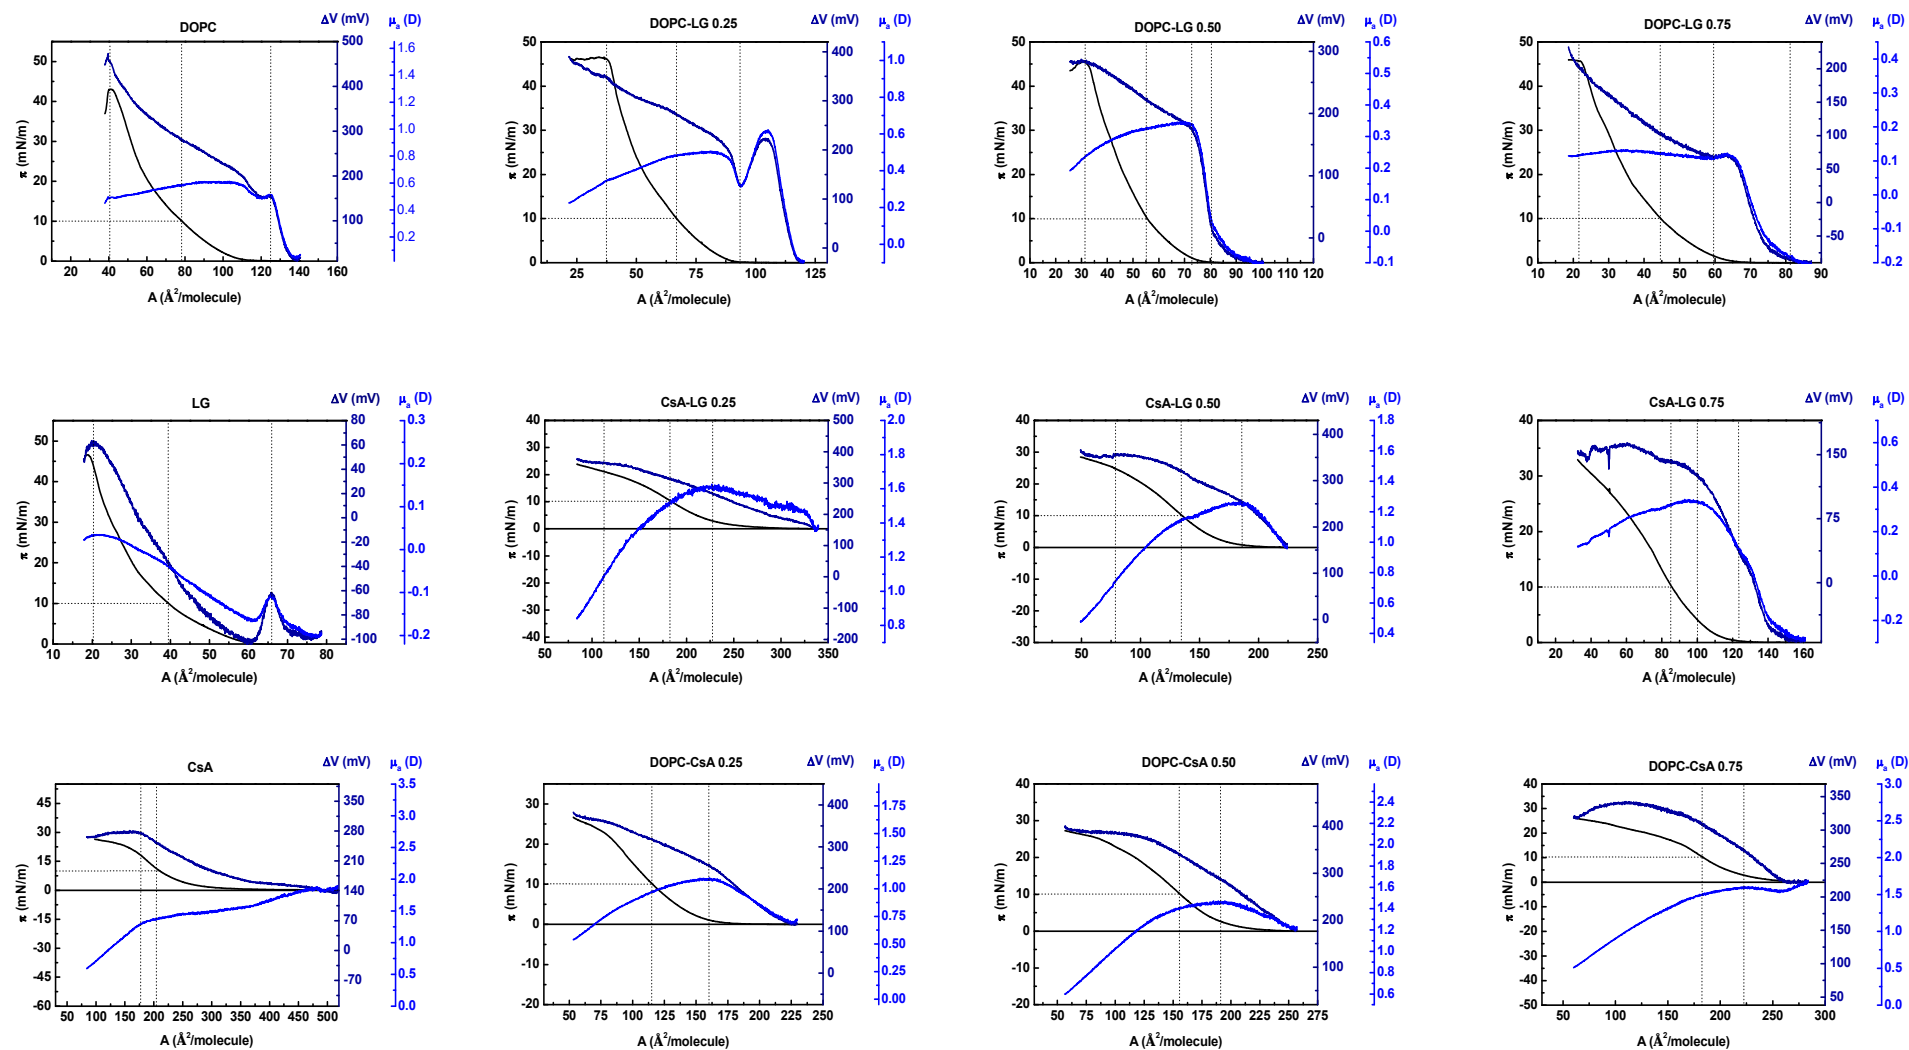

**Figure S2.** Surface pressure,  $\pi$  –, electric surface potential,  $\Delta V$  –, and apparent dipole moment,  $\mu_a$  –, area,  $A$ , isotherms for all monolayers studied.

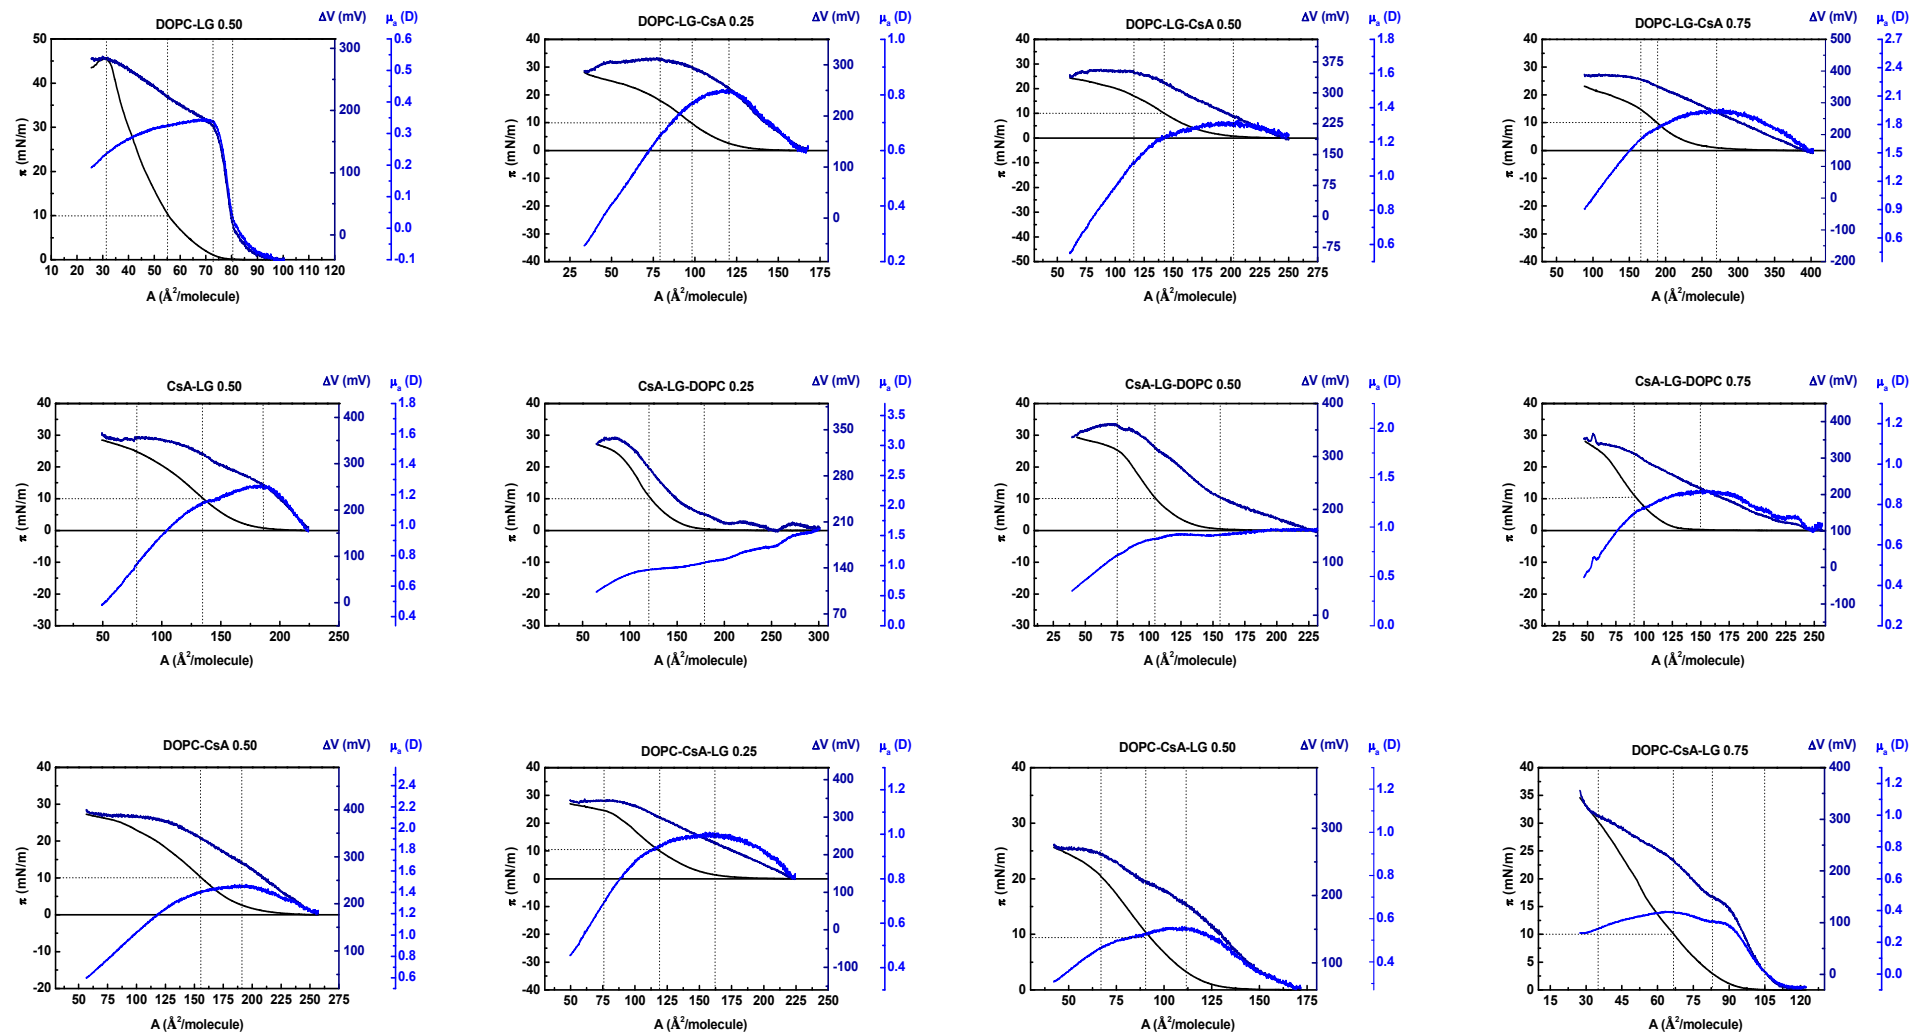

**Figure S2.** Surface pressure,  $\pi$  —, electric surface potential,  $\Delta V$  —, and apparent dipole moment,  $\mu_a$  —, area,  $A$ , isotherms for all monolayers studied (continued).
